# Supplementary material for: “Freedom to Breathe”: Youth Participatory Action Research (YPAR) to Investigate Air Pollution Inequities in Richmond, CA
Source: MDPI journal article supplement (doi:10.3390/ijerph18020554), 2021-01-11
Supplement: s1 [file s1]

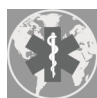

## Supplemental Materials

**Table S1.** Air pollution and noise pollution measurement results.

| Sample Site | Sampling Dates | NO <sub>2</sub> (ppb) | SO <sub>2</sub> (ppb) | 1st Spot Noise (dB) | 2nd Spot Noise (dB) | Average Spot Noise (dB) |
|-------------|----------------|-----------------------|-----------------------|---------------------|---------------------|-------------------------|
| 1           | 12/21-1/15     | 13.4                  | 0.04                  | -                   | 73.9                | 73.9                    |
| 2           | 12/21-1/15     | 14.3                  | 0.02                  | 74.5                | 72.5                | 73.5                    |
| 3           | 12/21-1/15     | 14.2                  | 0.13                  | 85.0                | 71.4                | 78.2                    |
| 4           | 12/21-1/15     | 14.9                  | 0.07                  | 83.0                | 79.9                | 81.5                    |
| 5           | 12/21-1/15     | 13.1                  | ND                    | 70.0                | 80.5                | 75.3                    |
| 6           | 12/21-1/15     | 12.4                  | ND                    | 81.0                | 75.0                | 78.0                    |
| 7           | 12/22-1/15     | 11.1                  | 0.03                  | 80.0                | 79.8                | 79.9                    |
| 8           | 12/22-1/15     | 8.2                   | 0.04                  | 66.5                | 73.4                | 70.0                    |
| 9           | 12/22-1/15     | 10.4                  | 0.14                  | 71.0                | 67.0                | 69                      |
| 10          | 12/22-1/15     | 11.4                  | 0.10                  | 84.0                | 79.6                | 81.8                    |
| 11          | 12/22-1/15     | 10.9                  | 0.01                  | 68.0                | 65.4                | 66.7                    |
| 12          | 12/22-1/15     | 10.8                  | 0.06                  | 67.0                | 68.8                | 67.9                    |
| Average     |                | 12.1                  | 0.06                  | 75.5                | 73.9                | 74.6                    |

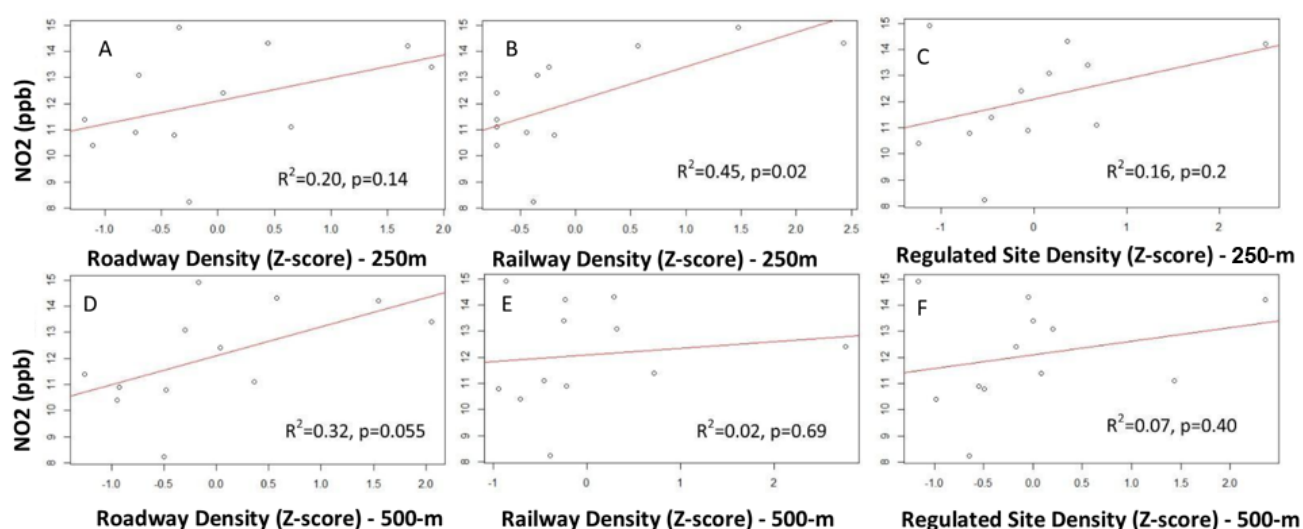

**Figure S1.** Scatter plots displaying the positive relationship between air pollution sources and NO<sub>2</sub> (SO<sub>2</sub> not shown because there was no evidence of a relationship between sources and SO<sub>2</sub> levels): A. Roadway density – 250-m; B. Railway density – 250-m; C. Regulated site density – 250-m; D. Roadway density – 500-m; E. Railway density – 500-m; F. Regulated site density – 500-m.

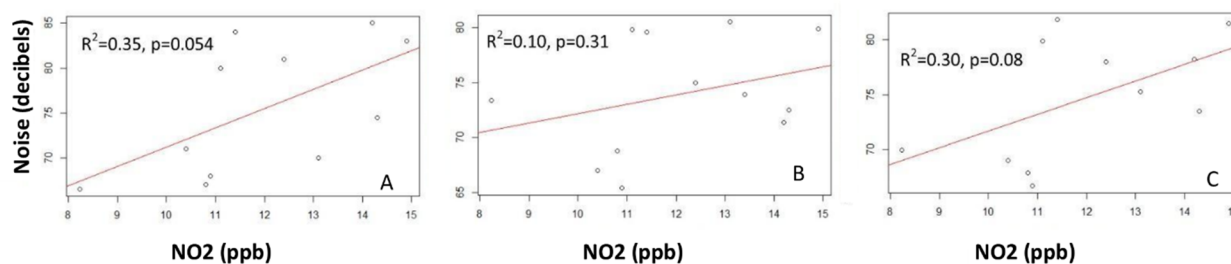

**Figure S2.** Scatter plots showing the positive relationship between NO<sub>2</sub> and spot noise measurements (SO<sub>2</sub> not shown because there was no evidence for a relationship between noise and SO<sub>2</sub>). (A) First measurement during sampler deployment; (B) Second measurement during sampler retrieval; (C) Average of both spot noise measurements.

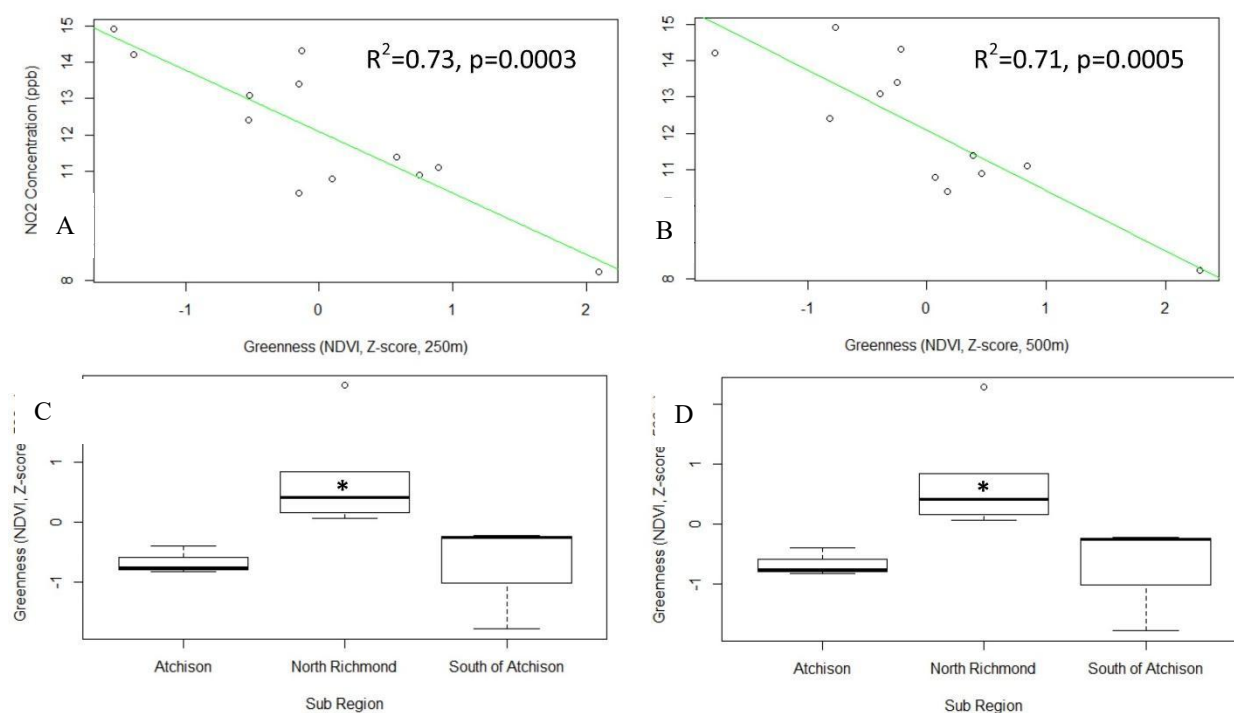

**Figure S3.** The first row (A and B) scatter plots show the negative relationship between area-level greenness (A = 250-m buffer; B = 500-m buffer) and NO2 concentrations (SO2 not shown since there was no evidence for a relationship between greenness and SO2). Second row (C and D) boxplots indicate area-level greenness for the different neighborhoods (C = 250-m buffer; D = 500-m buffer). North Richmond has significantly ( $p < 0.05$ ) higher area-level greenness.
